# Supplementary material for: Diet Optimization for Sustainability: INDIGOO, an Innovative Multilevel Model Combining Individual and Population Objectives
Source: MDPI journal article supplement (doi:10.3390/su141912667), 2022-10-05
Supplement: s1 [file s1]

# Diet optimization for sustainability: INDIGOO, an innovative multilevel model combining individual and population objectives.

Audrey Rocabois et al.

## Online Supplementary Material

**Table S1.** Food categorization

| Food group (N = 8)              | Food subgroups (N = 29)                                                                                 |
|---------------------------------|---------------------------------------------------------------------------------------------------------|
| Fruits & vegetables             | Fresh & processed fruits<br>Dried fruits & oilseeds<br>Raw, cooked vegetables & soups                   |
| Starches                        | Breakfast cereals<br>Unrefined starches<br>Refined starches                                             |
| Meat/eggs/fish                  | Eggs<br>Fish<br>Ruminant meat<br>Poultry/pork & game<br>Deli meat<br>Offal<br>Meat protein alternatives |
| Mixed dishes and sandwiches     | Animal-based mixed dishes<br>Vegetable-based mixed dishes                                               |
| Dairy products and alternatives | Dairy products alternatives<br>Cheese<br>Milk<br>Yogurt                                                 |
| Sweet products                  | Dairy dessert<br>Cakes & pastries<br>Biscuits and sweets                                                |
| Water & other drinks            | Sweet drinks<br>Water                                                                                   |

|              |                   |
|--------------|-------------------|
|              | Fruit juices 100% |
|              | Tea & coffee      |
| Fat products |                   |
|              | Spices & sauces   |
|              | Animal fats       |
|              | Vegetal fats      |

**Table S2.** Nutritional recommendations<sup>1</sup> applied in constraints

| Nutrient <sup>2</sup>                    |               | Unit      | Women |                 |                  |                 | Men      |                 |                  |                 |          |
|------------------------------------------|---------------|-----------|-------|-----------------|------------------|-----------------|----------|-----------------|------------------|-----------------|----------|
|                                          |               |           | age   | AR <sup>2</sup> | PRI <sup>2</sup> | AI <sup>3</sup> | MRV      | AR <sup>2</sup> | PRI <sup>2</sup> | AI <sup>2</sup> | MRV      |
| Total saturated fatty acids <sup>4</sup> |               | % energy  | all   |                 |                  |                 | 12       |                 |                  |                 | 12       |
| DHA EPA fatty acids                      |               | g/d       | all   |                 |                  | 0.5             |          |                 |                  | 0.5             |          |
| Lauric myristic palmitic fatty acids     |               | % energy  | all   |                 |                  |                 | 8        |                 |                  |                 | 8        |
| Linoleic fatty acid                      |               | % energy  | all   |                 |                  | 0.04            |          |                 |                  | 0.04            |          |
| Linolenic fatty acid                     |               | % energy  | all   |                 |                  | 0.01            |          |                 |                  | 0.01            |          |
| Oleic fatty acid                         |               | % energy  | all   |                 |                  | 15              | 20       |                 |                  | 15              | 20       |
| Water                                    |               | g/d       | all   |                 |                  | 1900            |          |                 |                  | 2375            |          |
| Fibers                                   |               | g/d       | all   |                 |                  | 30              |          |                 |                  | 30              |          |
| Macronutrients                           | Carbohydrates | % energy  | all   |                 |                  | 40              | 55       |                 |                  | 40              | 55       |
|                                          | Lipids        | % energy  | all   |                 |                  | 35              | 40       |                 |                  | 35              | 40       |
|                                          | Proteins      | % energy  | all   |                 |                  | 10              | 20       |                 |                  | 10              | 20       |
| Total sugars (without lactose)           |               | g/d       | all   |                 |                  |                 | 100      |                 |                  |                 | 100      |
| Minerals                                 | Cu            | mg/d      | all   | 0.8             | 1                |                 | 5        | 1               | 1.3              |                 | 5        |
|                                          | I             | µg/d      | all   |                 |                  | 150             | 600      |                 |                  | 150             | 600      |
|                                          | Mg            | mg/d      | all   |                 |                  | 360             |          |                 |                  | 420             |          |
|                                          | Na            | mg/d      | all   |                 |                  |                 | 2273     |                 |                  |                 | 2994     |
|                                          | P             | mg/d      | all   |                 |                  | 700             |          |                 |                  | 700             |          |
|                                          | Se            | µg/d      | all   |                 |                  | 70              | 300      |                 |                  | 70              | 300      |
|                                          | Zn            | mg/d      | all   | 6.2             | 7.5              |                 | 25       | 7.5             | 9.4              |                 | 25       |
|                                          | Ca            | mg/d      |       | <25             | 860              | 1000            | 2500     | 860             | 1000             |                 | 2500     |
|                                          |               | mg/d      |       | >25             | 750              | 950             | 2500     | 750             | 950              |                 | 2500     |
|                                          | Fe            | mg/d      |       | <56             | 6                | 16              |          | 6               | 11               |                 |          |
|                                          |               | mg/d      |       | >56             | 6                | 11              |          | 6               | 11               |                 |          |
|                                          | Vitamins      | A         | mg/d  | all             | 490              | 650             |          | 3000            | 570              | 750             |          |
| B1                                       |               | mg/kcal/d | all   |                 |                  | 0.00058         |          |                 |                  | 0.00058         |          |
| B12                                      |               | µg/d      | all   |                 |                  | 4               |          |                 |                  | 4               |          |
| B2                                       |               | mg/kcal/d | all   |                 |                  | 0.00071         |          |                 |                  | 0.00071         |          |
| B3                                       |               | mg/kcal/d | all   | 0.0054          | 0.0067           |                 | 900 mg/d | 0.0054          | 0.0067           |                 | 900 mg/d |
| B5                                       |               | mg/d      | all   |                 |                  | 4.7             |          |                 |                  | 5.8             |          |
| B6                                       |               | mg/d      | all   |                 |                  | 1.5             | 25       |                 |                  | 1.8             | 25       |
| B9                                       |               | µg/d      | all   | 250             | 330              |                 |          | 250             | 330              |                 |          |
| C                                        |               | mg/d      | all   | 90              | 110              |                 |          | 90              | 110              |                 |          |
| D                                        |               | mg/d      | all   |                 |                  | 5               |          |                 |                  | 5               |          |
| E                                        |               | mg/d      | all   |                 |                  | 9.9             |          |                 |                  | 10.5            |          |
| Molar ratio K/Na                         |               | .         | all   |                 |                  | 1.7             |          |                 |                  | 1.7             |          |

MRV: maximum recommended value; AR: average requirement; PRI: population reference intake; AI: adequate intake

<sup>1</sup> Nutritional recommended values, from Agence Nationale de Sécurité Sanitaire de l'alimentation, de l'environnement et du travail (ANSES) Actualisation des repères du PNNS : élaboration des références nutritionnelles; 2016., available online: <https://www.anses.fr/fr/system/files/NUT2012SA0103Ra-2.pdf>

<sup>2</sup> Minimum intake was imposed as follows: at least AR when observed intake was lower than AR, at least PRI when observed intake was greater than PRI and at least observed intake when observed intake was between PRI and AR

<sup>3</sup>For nutrients with an AI, minimum intake was imposed at AI, except for vitamin D. If observed vitamin D intake was lower than recommended intake (5µg/d), minimum intake was imposed at observed intake.

<sup>4</sup> If observed saturated fatty acid intake was lower than MRV, the maximal intake was imposed at observed intake

### Material S3. Principle of IBDO and INDIGOO objective function

Both in IBDO and INDIGOO, the aim was to find the modeled diet that comes as close as possible to the corresponding observed diet. The objective function was mainly inspired from Maillot et al. (2010) [7], where, for each individual, the objective function was aimed at 1) preferentially choosing foods from his or her food-repertoire (the set of foods declared as consumed by the individual); 2) minimizing only the decrease in the quantity of each repertoire-food, and, if necessary, 3) introducing non-repertoire-foods and 4) preferentially selecting the most frequently consumed foods by the French population. In this study, the increase of repertoire-food were also minimized. IBDO's objective function minimized individual dietary deviations separately for each individual. INDIGOO's objective function minimized sum of individual dietary deviations.

INDIGOO's optimization was run in two phases. In the first phase, diet optimization was conducted on the whole sample (n = 1 918) in order to identify infeasible diets (Figure 1, equation INDIGOO A). Diet was infeasible when optimization required to give up at least one constraint of the model. In the second phase, diet optimization was run on feasible diets only (Figure 1, equation INDIGOO B).

| IBDO                                                                                 | INDIGOO                                                                                                                                                                                                                                                                                                                      |
|--------------------------------------------------------------------------------------|------------------------------------------------------------------------------------------------------------------------------------------------------------------------------------------------------------------------------------------------------------------------------------------------------------------------------|
| $\text{Min } F_i = \sum_{j \in R_i} D_{i,j} + \sum_{j \notin R_i} W_j Q_{i,j}^{opt}$ | <p><b>A)</b> <math>\text{Min } F_{init} = \sum_{i=1}^{N_{tot}} (\sum_{j \in R_i} D_{i,j} + \sum_{j \notin R_i} W_j Q_{i,j}^{opt} + 10\,000\,000 * \sum_{c=1}^{c=n} E_{i,c})</math></p> <p><b>B)</b> <math>\text{Min } F = \sum_{i=1}^{N_{tot}} (\sum_{j \in R_i} D_{i,j} + \sum_{j \notin R_i} W_j Q_{i,j}^{opt})</math></p> |

With:

$F_i$ , the objective function of one IBDO model, representing the individual deviations for individual  $i$

$F_{init}$ , the objective function of the initial INDIGOO optimization, including infeasible diets

$F$ , the objective function of the final INDIGOO, representing the sum of each individual deviations among the sample

$R_i$ , the food repertoire of the individual  $i$

$D_{i,j} = \frac{|Q_{i,j}^{opt} - Q_{i,j}^{obs}|}{Q_{i,j}^{obs}}$ , the relative deviation between the optimized and observed intake of repertoire's food  $j$  for the individual  $i$

$Q_{i,j}^{opt}$ , the quantity in grams of the food  $j$  in the optimized diet of individual  $i$

$Q_{i,j}^{obs}$ , the quantity in grams of the food  $j$  in the observed diet of individual  $i$

$W_j = \frac{(1 + \frac{0.1 * N_{tot}}{Nb_{cons_j}})}{Q_j^{med}}$ , the weight of the food  $j$  to preferentially select the most consumed foods among additional foods

$Q_j^{med}$ , the median observed quantity of food  $j$  in the sample

$N_{tot}$ , the total number of individuals in the sample

$Nb_{cons_j}$ , the number of consumers of food  $j$

$E_{i,c}$ , the elastic variable, representing the deviation from the minimal or maximal value applied for the constraint  $c$  of individual  $i$

**Table S4.** Sociodemographic characteristics (%) by population class

|                                 |                                | All   | DEC-45% | DEC-30% | DEC-14% | INC+11% | <i>p</i> -value* |
|---------------------------------|--------------------------------|-------|---------|---------|---------|---------|------------------|
| Socio-occupational category (%) | Low                            | 14.85 | 19.58   | 17.17   | 8.79    | 11.03   | <0.0001          |
|                                 | Intermediate                   | 33.62 | 31.03   | 31.45   | 37.24   | 38.5    |                  |
|                                 | High                           | 9.07  | 10.59   | 7.69    | 8.64    | 10.58   |                  |
|                                 | Economically inactive          | 42.46 | 38.8    | 43.69   | 45.32   | 39.89   |                  |
| Education level (%)             | Low                            | 17.73 | 16.31   | 18.07   | 18.67   | 18.2    | 0.3924           |
|                                 | Middle                         | 51.59 | 51.9    | 54.43   | 49.9    | 44.77   |                  |
|                                 | High                           | 30.56 | 31.79   | 27.38   | 31.16   | 37.03   |                  |
|                                 | Missing value                  | 0.12  | .       | 0.11    | 0.27    | .       |                  |
| Physical activity (%)           | Low                            | 22.43 | 19.86   | 22.55   | 24.85   | 22.23   | 0.0981           |
|                                 | Moderate                       | 31.17 | 29.43   | 34.67   | 27.77   | 39.63   |                  |
|                                 | High                           | 45.25 | 49.64   | 42.03   | 45.67   | 37.55   |                  |
|                                 | Missing value                  | 1.15  | 1.07    | 0.75    | 1.71    | 0.59    |                  |
| Sex (%)                         | Men                            | 48.3  | 61.85   | 50.05   | 37.62   | 27.72   | <0.0001          |
|                                 | Women                          | 51.7  | 38.15   | 49.95   | 62.38   | 72.28   |                  |
| Family status (%)               | Couples with children          | 29.95 | 32.64   | 27.96   | 29.17   | 30.52   | 0.0172           |
|                                 | Couples without children       | 41.37 | 44.48   | 42.69   | 39.05   | 31.54   |                  |
|                                 | Single parent households       | 6.42  | 5.05    | 7.59    | 6.6     | 6.48    |                  |
|                                 | Single parent without children | 22.18 | 17.82   | 21.76   | 24.94   | 31.45   |                  |
|                                 | Missing value                  | 0.08  | .       | .       | 0.24    | .       |                  |
| Smoking status (%)              | Yes                            | 27.37 | 32.41   | 29.16   | 20.98   | 26.33   | <0.0001          |
|                                 | No                             | 70.63 | 63.68   | 69.8    | 77.86   | 72.09   |                  |
|                                 | Missing value                  | 2     | 3.91    | 1.05    | 1.16    | 1.58    |                  |

\* *p*-value of Chi-2 test

**Figure S5.** Variation of food groups (A) and Fruits & vegetables (B), Starches (C), Meat/eggs/fish & alternatives (D), Mixed dishes (E), Dairy products & alternatives (F), Sweet products (G), Water & other beverages (H) and Fat products (I) and subgroups between observed and optimized diets by population class<sup>1,2</sup>

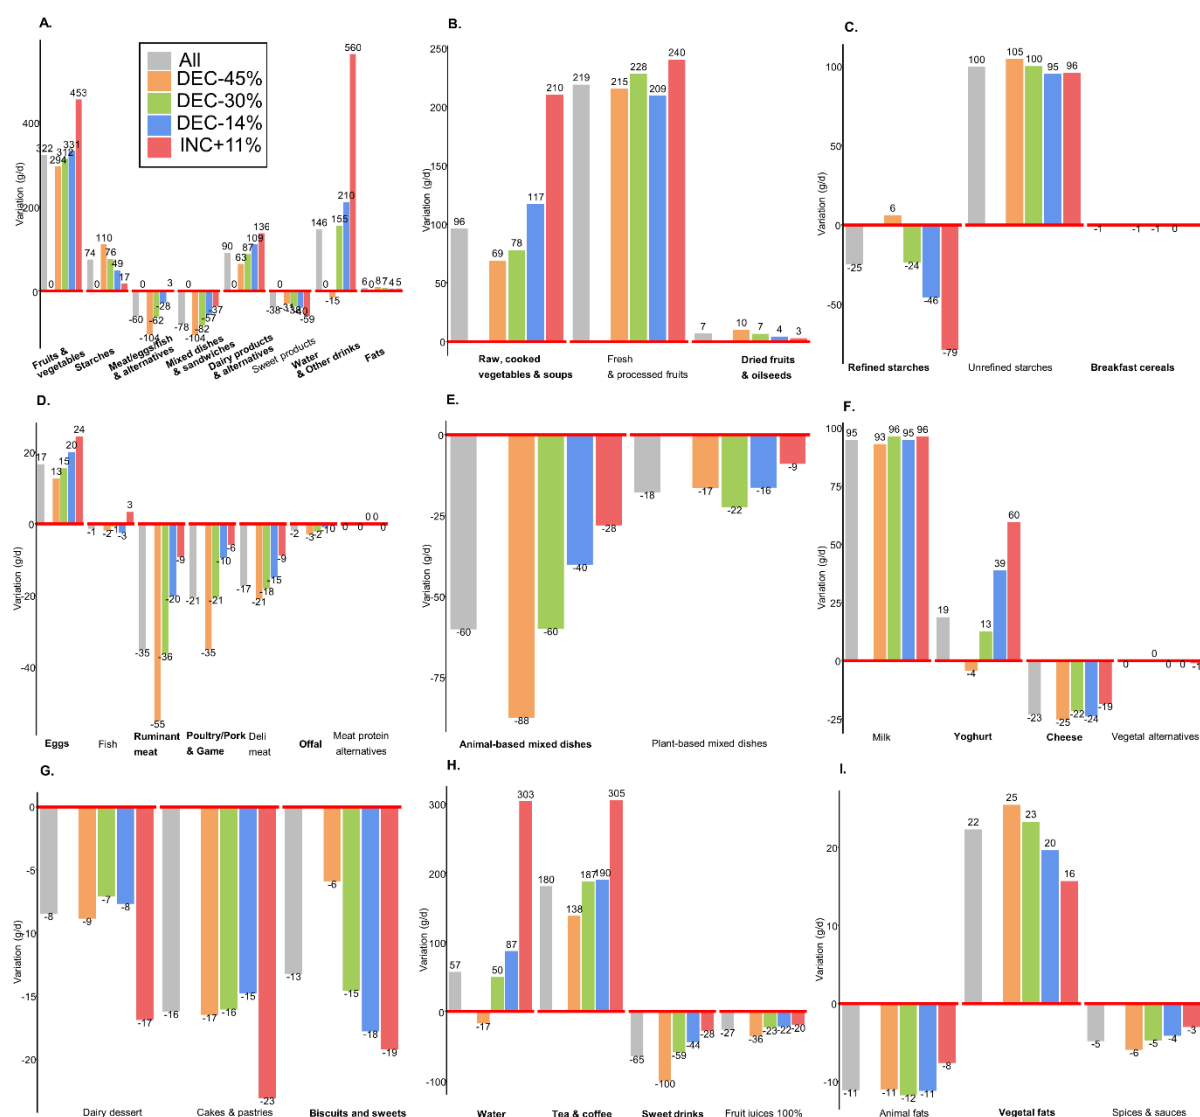

<sup>1</sup>Optimized amounts were significantly different than the observed amounts, except for meat/eggs/fish and alternatives (for INC+11% population class) and water and other beverages (for DEC-45% population class) food groups, and except for refined starches (for DEC-45% population class), breakfast cereals (for INC+11% population class), fish (for DEC-45%, DEC-30% and INC+11% population classes), meat protein alternatives (for all and each population classes), yoghurt (for DEC-45% population class), vegetal alternatives (for DEC-30%, DEC-14% and INC+11% population classes) and water (for DEC-45% et DEC-30% population classes).

<sup>2</sup> Bold food groups or subgroups indicated significant differences across population classes adjusted on energy intake and dietary GHGE.
